# Supplementary material for: Tailoring the magnetic properties of FexCo(1−x)nanopowders prepared by a polyol process
Source: Royal Society of Chemistry journal article supplement (doi:10.1039/c7dt01691c), 2017-01-01
Supplement: c7dt01691c1.pdf [file c7dt01691c1.pdf]

## Supporting Information:

### **Tailoring the Magnetic Properties of $\text{Fe}_x\text{Co}_{(1-x)}$ Nanopowders prepared by Polyol Process**

Dustin M. Clifford <sup>a</sup>, Carlos E. Castano <sup>a</sup>, Melissa H. M. Tsui <sup>b</sup>, Jessika V. Rojas <sup>a</sup>, and Everett E. Carpenter <sup>b</sup>

*Department of Nuclear and Mechanical Engineering, Virginia Commonwealth University, Richmond, VA 23284<sup>a</sup>*

*Department of Chemistry, Virginia Commonwealth University, Richmond, VA 23284<sup>b</sup>*

Authors to whom correspondence should be addressed: [clifforddm@mymail.vcu.edu](mailto:clifforddm@mymail.vcu.edu),  
[ecarpenter2@vcu.edu](mailto:ecarpenter2@vcu.edu)

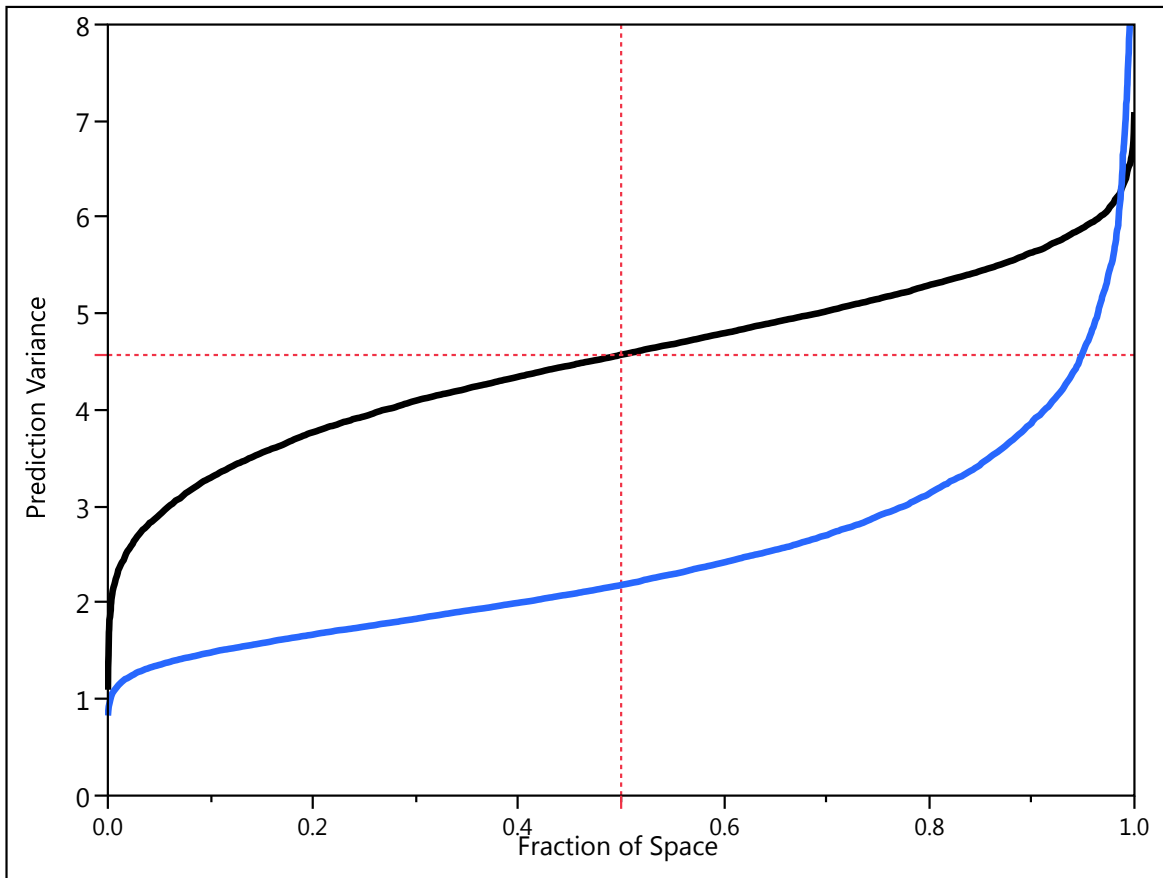

**Figure S1:** Overlay plot of I-optimal design prediction variance (blue, bottom) over D-optimal design (black, top) from original DOE. The I-optimal design, as used in this DoE, gives a lower prediction variance values over the entire design space (x-axis).

**Table S1.** Custom Design Experiment Table containing all validation experiments with all responses.

| RUN ID | [OH] M | Rx time (mins) | [Ag] M | [Ag]/[Fe+Co] molar ratio | [Fe+Co] M | [OH]/[Fe+Co] molar ratio | Stir Rate (stir cycle/s) | [Fe]/[Co] molar ratio | % FeCo alloy (bcc) phase | % ferrite (cubic) phase | % Co (fcc) | % Ag (fcc) phase | % NaCl phase | morphology            | He (kOe) | Ms (emu/g) | particle size (nm) | FeCo (110) crystallite size (nm) | atomic % of Co in Fe (EDS) | Fe/Co at. Composition (EDS) |
|--------|--------|----------------|--------|--------------------------|-----------|--------------------------|--------------------------|-----------------------|--------------------------|-------------------------|------------|------------------|--------------|-----------------------|----------|------------|--------------------|----------------------------------|----------------------------|-----------------------------|
| 1      | 1.5    | 32             | 6E-05  | 6E-04                    | 0.10      | 15                       | Hi                       | 2.5                   | 18                       | 77                      | 5          | 0                | 0            | spheroid              | 0.26     | 111        | 160                | 36                               | 37                         | 1.7                         |
| 2      | 1.5    | 32             | 1E-05  | 1E-04                    | 0.09      | 17                       | Lo                       | 4.5                   | 23                       | 77                      | 0          | 0                | 0            | spheroid              | 0.24     | 92         | 184                | 23                               | 24                         | 3.1                         |
| 3      | 3.0    | 32             | 6E-05  | 4E-04                    | 0.15      | 20                       | Hi                       | 2.5                   | 58                       | 42                      | 0          | 0                | 0            | chain                 | 0.23     | 160        | 170                | 35                               | -                          | -                           |
| 4      | 3.0    | 24             | 1E-02  | 1E-01                    | 0.09      | 32                       | Med                      | 1.7                   | 60                       | 0                       | 0          | 40               | 0            | cuboid                | 0.23     | 145        | 185                | 20                               | -                          | -                           |
| 5      | 3.0    | 24             | 6E-05  | 4E-04                    | 0.15      | 20                       | Med                      | 2.1                   | 74                       | 16                      | 10         | 0                | 0            | chain                 | 0.1      | 186        | 201                | 28                               | 47                         | 1.1                         |
| 6      | 3.0    | 24             | 1E-03  | 2E-02                    | 0.05      | 60                       | Med                      | 2.6                   | 80                       | 0                       | 0          | 20               | 0            | chain                 | 0.09     | 208        | 250                | 46                               | -                          | -                           |
| 7      | 1.5    | 32             | 2E-04  | 2E-03                    | 0.10      | 15                       | Lo                       | 0.5                   | 84                       | 0                       | 16         | 0                | 0            | cuboid                | 0.12     | 181        | 148                | 45                               | 73                         | 0.4                         |
| 8      | 3.0    | 12             | 0E+00  | 0E+00                    | 0.09      | 32                       | Med                      | 1.9                   | 93                       | 0                       | 0          | 0                | 7            | chain                 | 0.13     | 166        | 164                | 42                               | 48                         | 1.1                         |
| 9      | 1.5    | 24             | 2E-04  | 4E-03                    | 0.05      | 30                       | Lo                       | 2.1                   | 96                       | 4                       | 0          | 0                | 0            | chain                 | 0.19     | 188        | 131                | 39                               | 36                         | 1.8                         |
| 10     | 3.0    | 32             | 5E-05  | 1E-03                    | 0.05      | 59                       | Lo                       | 0.5                   | 96                       | 0                       | 4          | 0                | 0            | chain                 | 0.25     | 177        | 117                | 28                               | 72                         | 0.4                         |
| 11     | 3.0    | 16             | 1E-05  | 2E-04                    | 0.05      | 60                       | Hi                       | 2.1                   | 100                      | 0                       | 0          | 0                | 0            | chain                 | 0.21     | 191        | 101                | 38                               | 32                         | 2.1                         |
| 12     | 3.0    | 32             | 1E-05  | 2E-04                    | 0.05      | 58                       | Hi                       | 0.9                   | 100                      | 0                       | 0          | 0                | 0            | chain                 | 0.33     | 169        | 76                 | 32                               | 58                         | 0.7                         |
| 13     | 1.5    | 32             | 1E-05  | 2E-04                    | 0.05      | 29                       | Med                      | 0.9                   | 100                      | 0                       | 0          | 0                | 0            | cuboid                | 0.31     | 176        | 76                 | 31                               | 58                         | 0.7                         |
| 14     | 3.0    | 32             | 1E-05  | 7E-05                    | 0.15      | 20                       | Med                      | 0.9                   | 100                      | 0                       | 0          | 0                | 0            | chain (and ellipsoid) | 0.16     | 196        | 136                | 34                               | 54                         | 0.9                         |
| 15     | 3.0    | 16             | 1E-05  | 2E-04                    | 0.05      | 60                       | Lo                       | 0.5                   | 100                      | 0                       | 0          | 0                | 0            | chain                 | 0.26     | 170        | 108                | 28                               | 69                         | 0.5                         |
| 16     | 3.0    | 16             | 1E-05  | 2E-04                    | 0.05      | 63                       | Lo                       | 1.8                   | 100                      | 0                       | 0          | 0                | 0            | chain                 | 0.16     | 198        | 119                | 38                               | 35                         | 1.9                         |
| 17     | 3.0    | 32             | 1E-05  | 2E-04                    | 0.05      | 63                       | Lo                       | 1.8                   | 100                      | 0                       | 0          | 0                | 0            | chain                 | 0.18     | 195        | 125                | 38                               | 41                         | 1.5                         |
| 18     | 3.0    | 16             | 1E-05  | 1E-04                    | 0.10      | 30                       | Lo                       | 0.5                   | 100                      | 0                       | 0          | 0                | 0            | cuboid                | 0.15     | 178        | 113                | 31                               | 72                         | 0.4                         |
| 19     | 1.5    | 32             | 6E-05  | 1E-03                    | 0.05      | 30                       | Hi                       | 2.6                   | 100                      | 0                       | 0          | 0                | 0            | chain                 | 0.14     | 202        | 108                | 34                               | 36                         | 1.7                         |
| 20     | 3.0    | 24             | 6E-05  | 4E-04                    | 0.15      | 20                       | Hi                       | 0.9                   | 100                      | 0                       | 0          | 0                | 0            | chain (and ellipsoid) | 0.15     | 195        | 120                | 34                               | 55                         | 0.8                         |
| 21     | 3.0    | 32             | 2E-04  | 4E-03                    | 0.05      | 63                       | Hi                       | 1.8                   | 100                      | 0                       | 0          | 0                | 0            | chain                 | 0.2      | 185        | 126                | 38                               | 47                         | 1.1                         |
| 22     | 3.0    | 16             | 2E-04  | 4E-03                    | 0.05      | 63                       | Med                      | 1.8                   | 100                      | 0                       | 0          | 0                | 0            | chain                 | 0.16     | 196        | 141                | 38                               | 33                         | 2.0                         |
| 23     | 3.0    | 32             | 2E-04  | 1E-03                    | 0.15      | 20                       | Hi                       | 2.5                   | 100                      | 0                       | 0          | 0                | 0            | spheroid              | 0.11     | 199        | 82                 | 35                               | 41                         | 1.5                         |
| 24     | 3.0    | 16             | 2E-04  | 2E-03                    | 0.10      | 30                       | Med                      | 0.5                   | 100                      | 0                       | 0          | 0                | 0            | cuboid                | 0.12     | 186        | 141                | 28                               | 69                         | 0.4                         |
| 25     | 3.0    | 32             | 2E-04  | 1E-03                    | 0.15      | 19                       | Med                      | 1.3                   | 100                      | 0                       | 0          | 0                | 0            | chain                 | 0.23     | 194        | 92                 | 26                               | 52                         | 0.9                         |
| 26     | 1.5    | 16             | 2E-04  | 4E-03                    | 0.05      | 30                       | Lo                       | 0.5                   | 100                      | 0                       | 0          | 0                | 0            | cuboid                | 0.13     | 185        | 161                | 23                               | 67                         | 0.5                         |
| 27     | 3.0    | 16             | 2E-04  | 4E-03                    | 0.05      | 60                       | Lo                       | 2.1                   | 100                      | 0                       | 0          | 0                | 0            | chain                 | 0.13     | 215        | 176                | 51                               | 35                         | 1.9                         |
| 28     | 1.5    | 24             | 2E-04  | 4E-03                    | 0.05      | 30                       | Lo                       | 2.1                   | 100                      | 0                       | 0          | 0                | 0            | chain                 | 0.18     | 209        | 151                | 44                               | 38                         | 1.6                         |
| 29     | 3.0    | 32             | 2E-04  | 4E-03                    | 0.05      | 60                       | Lo                       | 0.5                   | 100                      | 0                       | 0          | 0                | 0            | cuboid                | 0.15     | 175        | 149                | 28                               | 70                         | 0.4                         |
| 30     | 3.0    | 32             | 6E-05  | 1E-03                    | 0.05      | 63                       | Hi                       | 1.8                   | 100                      | 0                       | 0          | 0                | 0            | chain                 | 0.25     | 185        | 108                | 44                               | -                          | -                           |
| 31     | 3.0    | 24             | 5E-05  | 5E-04                    | 0.09      | 32                       | Hi                       | 1.9                   | 100                      | 0                       | 0          | 0                | 0            | chain                 | 0.23     | 209        | 135                | 41                               | 40                         | 1.5                         |
| 32     | 3.0    | 24             | 2E-05  | 2E-04                    | 0.09      | 32                       | Hi                       | 1.7                   | 100                      | 0                       | 0          | 0                | 0            | chain                 | 0.37     | 174        | 80                 | 29                               | -                          | -                           |
| 33     | 3.0    | 24             | 0E+00  | 0E+00                    | 0.09      | 32                       | Med                      | 1.7                   | 100                      | 0                       | 0          | 0                | 0            | chain                 | 0.13     | 205        | 180                | 37                               | 42                         | 1.4                         |
| 34     | 3.0    | 24             | 0E+00  | 0E+00                    | 0.05      | 63                       | Med                      | 1.8                   | 100                      | 0                       | 0          | 0                | 0            | chain                 | 0.25     | 153        | 149                | 33                               | 54                         | 0.9                         |
| 35     | 3.0    | 24             | 0E+00  | 0E+00                    | 0.14      | 21                       | Med                      | 1.8                   | 100                      | 0                       | 0          | 0                | 0            | chain                 | 0.13     | 204        | 173                | 40                               | 41                         | 1.4                         |
| 36     | 3.0    | 16             | 2E-04  | 4E-03                    | 0.05      | 60                       | Lo                       | 2.6                   | 100                      | 0                       | 0          | 0                | 0            | chain                 | 0.26     | 197        | 135                | 45                               | 29                         | 2.4                         |
| 37     | 3.0    | 16             | 2E-04  | 4E-03                    | 0.05      | 60                       | Lo                       | 2.1                   | 100                      | 0                       | 0          | 0                | 0            | chain                 | 0.23     | 209        | 152                | 40                               | 33                         | 2.1                         |
| 38     | 3.0    | 16             | 2E-04  | 4E-03                    | 0.05      | 60                       | Lo                       | 2.1                   | 100                      | 0                       | 0          | 0                | 0            | chain                 | 0.24     | 200        | 144                | 37                               | 33                         | 2.0                         |
| 39     | 3.0    | 24             | 2E-04  | 4E-03                    | 0.05      | 60                       | Lo                       | 0.5                   | 100                      | 0                       | 0          | 0                | 0            | cuboid                | 0.4      | 173        | 71                 | 29                               | 71                         | 0.4                         |

|    |      |    |       |       |      |    |     |     |     |   |   |   |   |            |      |     |     |    |    |     |
|----|------|----|-------|-------|------|----|-----|-----|-----|---|---|---|---|------------|------|-----|-----|----|----|-----|
| 40 | 1.5  | 16 | 2E-04 | 4E-03 | 0.05 | 30 | Lo  | 0.5 | 100 | 0 | 0 | 0 | 0 | cuboid     | 0.22 | 183 | 125 | 27 | -  | -   |
| 41 | 3.0  | 16 | 1E-06 | 2E-05 | 0.05 | 60 | Hi  | 2.1 | 100 | 0 | 0 | 0 | 0 | chain      | 0.18 | 208 | 135 | 43 | 30 | 2.3 |
| 42 | 3.0  | 32 | 1E-06 | 2E-05 | 0.05 | 58 | Hi  | 0.9 | 100 | 0 | 0 | 0 | 0 | chain      | 0.27 | 192 | 117 | 32 | 57 | 0.8 |
| 43 | 1.5  | 32 | 1E-06 | 2E-05 | 0.05 | 29 | Hi  | 0.9 | 100 | 0 | 0 | 0 | 0 | chain      | 0.23 | 197 | 116 | 29 | 50 | 1.0 |
| 44 | 3.0  | 16 | 1E-06 | 2E-05 | 0.05 | 60 | Lo  | 0.5 | 100 | 0 | 0 | 0 | 0 | chain      | 0.27 | 177 | 97  | 30 | 52 | 0.9 |
| 45 | 3.0  | 16 | 1E-06 | 2E-05 | 0.05 | 63 | Lo  | 1.8 | 100 | 0 | 0 | 0 | 0 | chain      | 0.22 | 200 | 150 | 42 | 37 | 1.7 |
| 46 | 3.0  | 24 | 1E-04 | 1E-03 | 0.09 | 33 | Med | 2.0 | 100 | 0 | 0 | 0 | 0 | chain      | 0.2  | 215 | 130 | 45 | 40 | 1.5 |
| 47 | 3.0  | 24 | 0E+00 | 0E+00 | 0.09 | 33 | Med | 2.0 | 100 | 0 | 0 | 0 | 0 | chain      | 0.13 | 209 | 172 | 39 | 43 | 1.3 |
| 48 | 3.0  | 24 | 0E+00 | 0E+00 | 0.09 | 33 | Med | 2.0 | 100 | 0 | 0 | 0 | 0 | chain      | 0.15 | 148 | 174 | 35 | -  | -   |
| 49 | 3.0  | 24 | 0E+00 | 0E+00 | 0.09 | 33 | Med | 2.0 | 100 | 0 | 0 | 0 | 0 | chain      | 0.12 | 202 | 170 | 31 | 41 | 1.4 |
| 50 | 3.0  | 24 | 5E-05 | 1E-03 | 0.05 | 56 | Lo  | 0.5 | 100 | 0 | 0 | 0 | 0 | chain      | 0.23 | 188 | 114 | 29 | 72 | 0.4 |
| 51 | 3.0  | 16 | 5E-05 | 1E-03 | 0.05 | 58 | Lo  | 0.5 | 100 | 0 | 0 | 0 | 0 | chain      | 0.19 | 176 | 106 | 29 | -  | -   |
| 52 | 0.05 | 16 | 1E-05 | 1E-04 | 0.10 | 1  | Lo  | 1.0 | -   | - | - | - | - | no product | -    | -   | -   | -  | -  | -   |
| 53 | 0.05 | 16 | 1E-05 | 9E-05 | 0.11 | 0  | Lo  | 1.2 | -   | - | - | - | - | no product | -    | -   | -   | -  | -  | -   |
| 54 | 0.05 | 24 | 1E-05 | 7E-05 | 0.15 | 0  | Lo  | 1.1 | -   | - | - | - | - | no product | -    | -   | -   | -  | -  | -   |
| 55 | 0.05 | 32 | 1E-05 | 7E-05 | 0.15 | 0  | Lo  | 2.8 | -   | - | - | - | - | no product | -    | -   | -   | -  | -  | -   |
| 56 | 0.05 | 16 | 1E-05 | 2E-04 | 0.05 | 1  | Med | 4.0 | -   | - | - | - | - | no product | -    | -   | -   | -  | -  | -   |
| 57 | 0.05 | 24 | 1E-05 | 2E-04 | 0.05 | 1  | Hi  | 0.7 | -   | - | - | - | - | no product | -    | -   | -   | -  | -  | -   |
| 58 | 0.05 | 24 | 1E-05 | 7E-05 | 0.15 | 0  | Hi  | 0.9 | -   | - | - | - | - | no product | -    | -   | -   | -  | -  | -   |
| 59 | 0.05 | 16 | 1E-04 | 2E-03 | 0.05 | 1  | Med | 1.5 | -   | - | - | - | - | no product | -    | -   | -   | -  | -  | -   |
| 60 | 0.05 | 24 | 1E-04 | 7E-04 | 0.15 | 0  | Hi  | 2.0 | -   | - | - | - | - | no product | -    | -   | -   | -  | -  | -   |
| 61 | 0.05 | 16 | 2E-04 | 1E-03 | 0.15 | 0  | Lo  | 2.0 | -   | - | - | - | - | no product | -    | -   | -   | -  | -  | -   |
| 62 | 0.05 | 24 | 2E-04 | 2E-03 | 0.10 | 1  | Med | 1.0 | -   | - | - | - | - | no product | -    | -   | -   | -  | -  | -   |
| 63 | 0.05 | 16 | 2E-04 | 1E-03 | 0.15 | 0  | Hi  | 2.0 | -   | - | - | - | - | no product | -    | -   | -   | -  | -  | -   |
| 64 | 0.05 | 16 | 2E-04 | 1E-03 | 0.15 | 0  | Hi  | 0.5 | -   | - | - | - | - | no product | -    | -   | -   | -  | -  | -   |

## Equipment

The as-synthesized nanopowders were analyzed by XRD using an X'Pert Pro diffractometer (Panalytical) to identify all phases present as well as measure mean crystallite size (Scherrer) of the (110) in all  $\text{Fe}_x\text{Co}_{(1-x)}$  phases. The XRD analysis used a  $\text{Cu K}\alpha_1 = 1.54 \text{ \AA}$  anode, Bragg-Brentano configuration, oriented single crystal Si wafer as sample holder, 0.5 degree slit with a  $1^\circ$  fixed divergence slit and a  $0.5^\circ$  anti-scatter slit, 10 mm mask and a Ni filter to remove  $\text{Cu K}\beta$ . Scanning electron microscopy (SEM) was performed to investigate morphology and obtain mean particle diameters using a Hitachi, SU-70 FE-SEM. Transmission electron microscopy (TEM) was used to probe microstructure by brightfield imaging and confirm phase presence by selected area electron diffraction (SAED) using a Zeiss Libra at 120 keV. Vibrating sample magnetometry (VSM) was performed to measure saturation magnetization (emu/g) and coercivity (Oe) of each as-synthesized nanopowder. Each nanopowder was massed in a polyethylene capsule and centered onto a non-magnetic ( $\leq 1 \text{ e}^{-6}$  emu) brass sample holder and was oscillated in a sweeping field from -3 to 3 T using a Quantum Design Versalab VSM.

For high [OH]:[Metal] ratios above 30 the  $\text{Fe}_x\text{Co}_{(1-x)}$  alloy formation is expected throughout the entire Fe/Co composition range. In contrast, for lower OH/Metal ratios, multi-phasic nanopowders were synthesized. Cobalt ferrite and Co (fcc) were formed at higher Fe/Co molar ratios ( $< 1.8$ ) and  $\text{Fe}_x\text{Co}_{(1-x)}$  alloy containing Co (fcc) at lower Fe/Co ( $< 1$ ) ratios. Increasing the [OH]:[Metal]  $> 60$  becomes problematic for vertical stirring where concentrations of [OH]  $\leq 7 \text{ M}$  were appropriate.

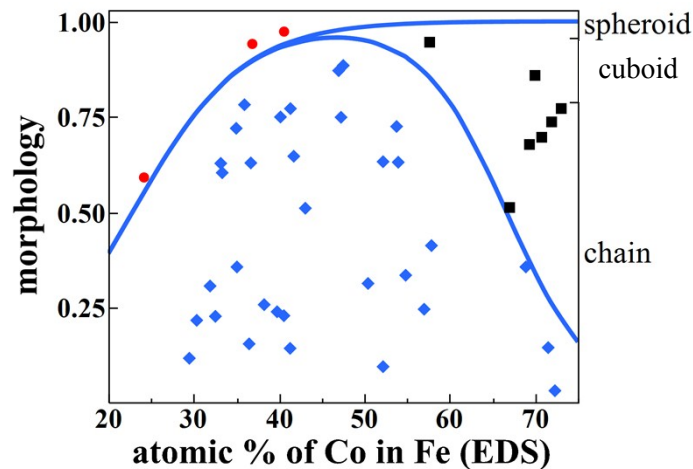

**Figure S2.** Logistic fit (Prob>ChiSq <0.0001) of morphology versus atomic % of Co in Fe by EDS analysis for all nanopowders synthesized.

**Table S2.** Correlation Probabilities and their sources for modelling % FeCo phase as a response in nanopowders synthesized using significant parameters as shown. These parameters were used to generate the RSM in Figure S3.

| Source                                      | LogWorth | PValue  |
|---------------------------------------------|----------|---------|
| [OH]/[Fe+Co]                                | 30.012   | 0.00000 |
| [OH]/[Fe+Co]*[OH]/[Fe+Co]                   | 24.958   | 0.00000 |
| [Fe]:[Co] molar ratio*Rx time (mins)        | 1.790    | 0.01622 |
| [Fe]:[Co] molar ratio*[Fe]:[Co] molar ratio | 1.549    | 0.02822 |
| [Fe]:[Co] molar ratio                       | 1.125    | 0.07498 |

**Table S3.** Correlation Probabilities and their sources for modelling mean crystallite size (nm) as a response in FeCo-based nanopowders synthesized using significant parameters as shown. These parameters were used to generate the RSM in Figure 8.

| Source                                                            | LogWorth | PValue  |
|-------------------------------------------------------------------|----------|---------|
| [Fe]:[Co] molar ratio                                             | 4.705    | 0.00002 |
| [Fe]:[Co] molar ratio*[Ag]/[Fe+Co] molar ratio                    | 1.975    | 0.01060 |
| [Fe]:[Co] molar ratio*[Fe]:[Co] molar ratio*[Fe]:[Co] molar ratio | 1.176    | 0.06666 |

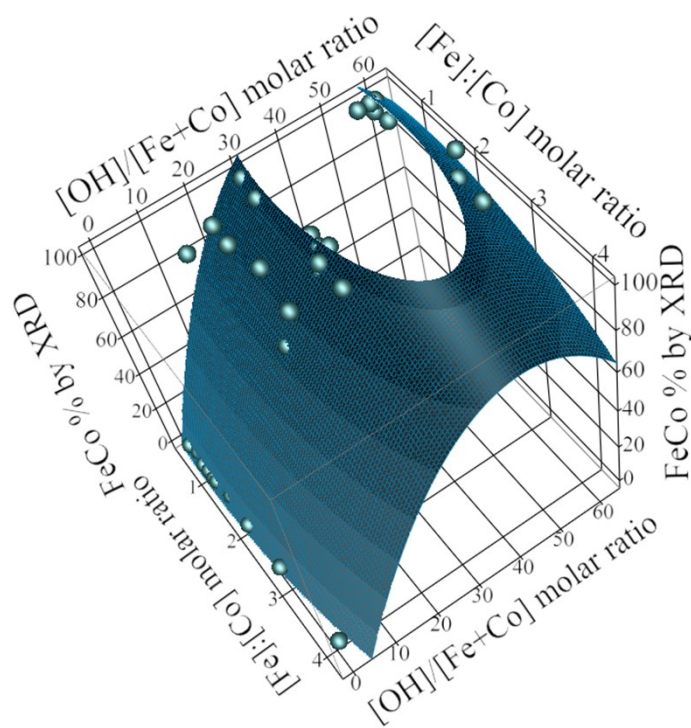

**Figure S3.** RSM of FeCo % of total phase by XRD by synthesis parameters of [OH]/[Fe+Co] and [Fe]/[Co] molar ratios.

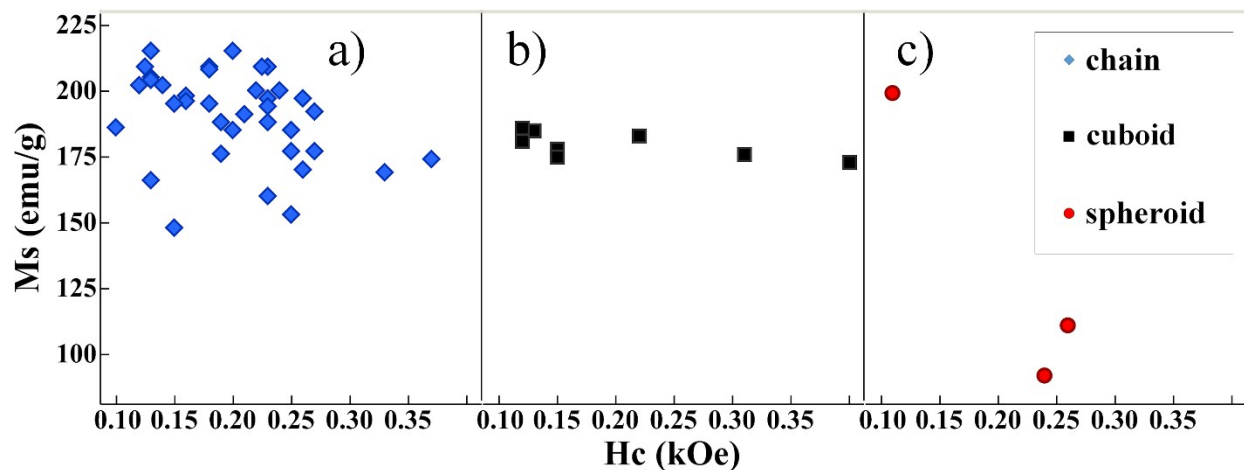

**Figure S4.** Plots of measured  $M_s$  (emu/g) and  $H_c$  (Oe) for each nanopowder containing either a) chain-, b) cuboid-, or c) spheroid-based morphologies.

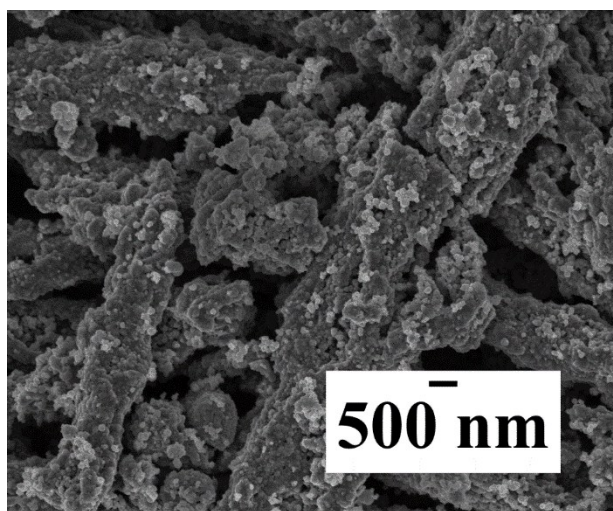

**Figure S5.** SEM indicating spheroids on the surface of large agglomerates. The nanopowder sample contained FeCo by XRD and possessed an  $M_s = 199$  (emu/g). (see RUN ID 23 in TABLE S1)

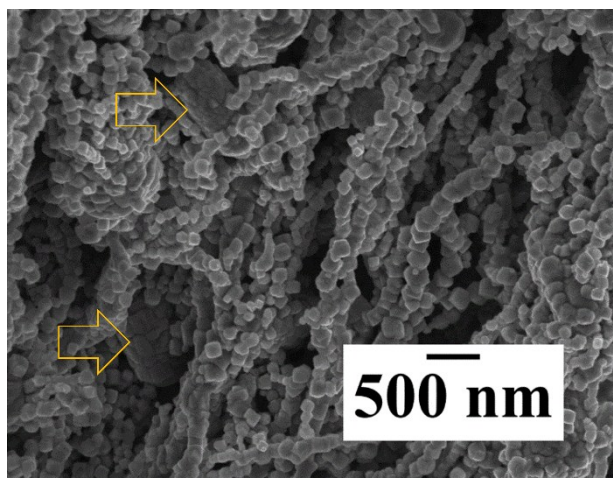

**Figure S6.** SEM showing mixed morphology of chain and ellipsoid (orange arrows) combinations of FeCo by XRD. (see RUN ID 14 in TABLE S1).

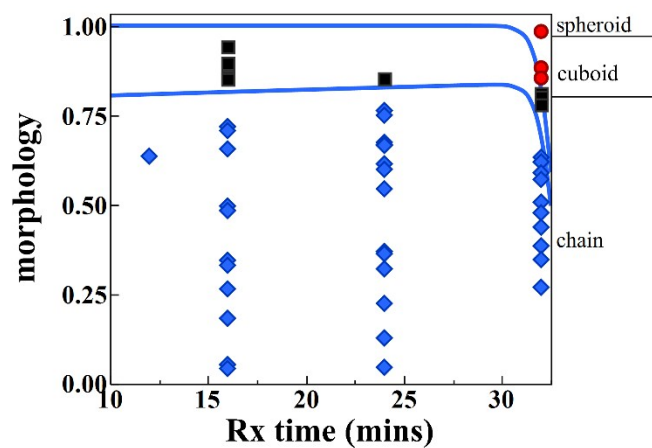

**Figure S7.** Logistic fit ( $\text{Prob} > \text{ChiSq} < 0.00340$ ) of morphology with total reaction time (mins).



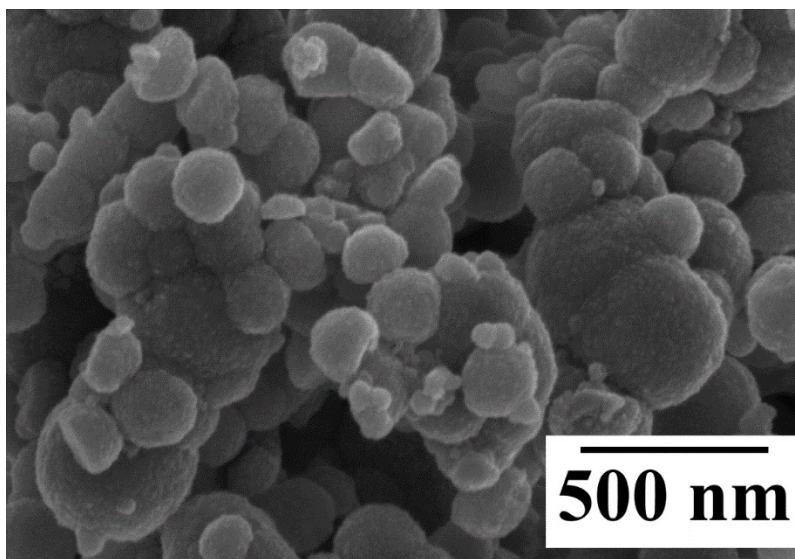

**Figure S8.** SEM showing ferritic spheroids synthesized using an [Fe]/[Co] molar ratio = 4.5 as a validation experiment. (see RUN ID 2 in TABLE S1)

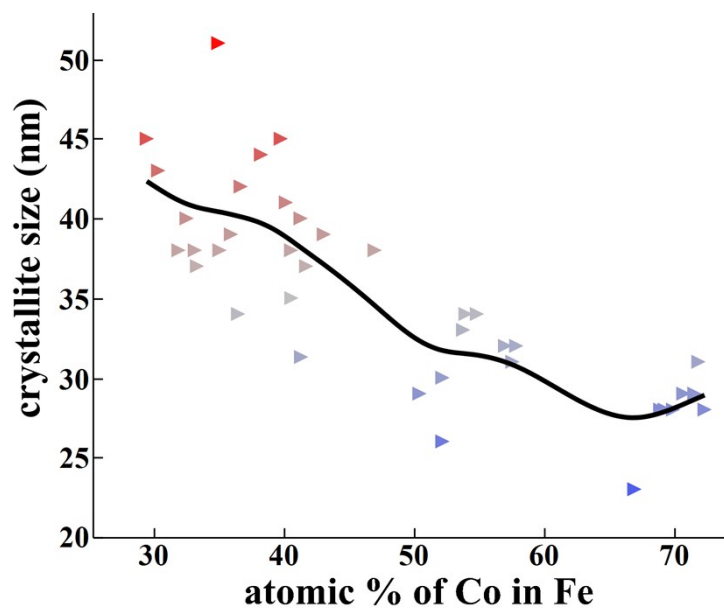

**Figure S9.** The mean crystallite size of the (110) in FeCo (bcc) of as-synthesized nanopowders with respect to their atomic % of Co in Fe by EDS analysis.

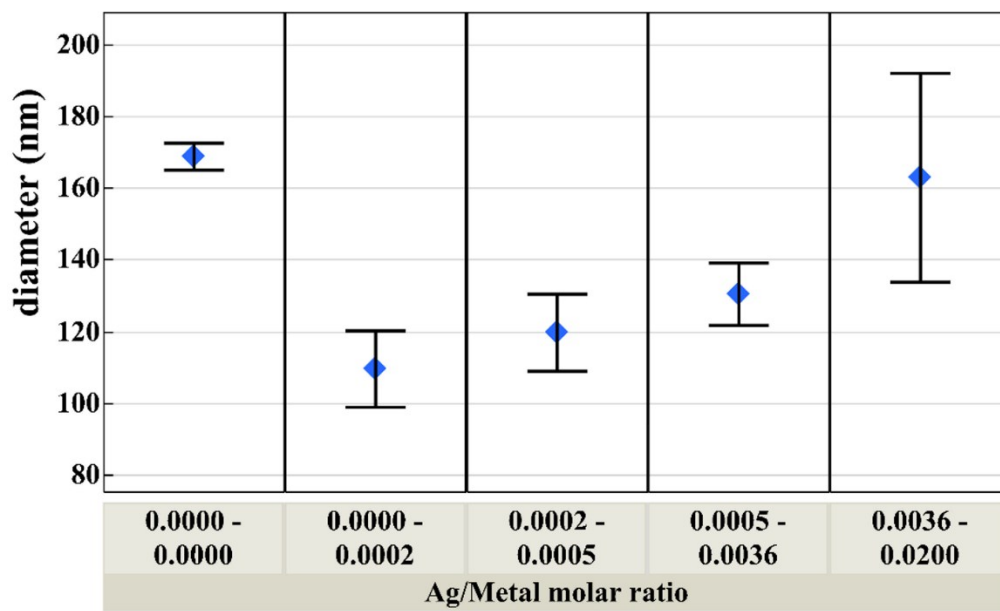

**Figure S10.** Mean particle diameters were measured for nanopowders synthesized by using various ranges of [Ag]/[Fe+Co] molar ratios. The lowest mean particle diameter is indicated for [Ag]/[Fe+Co] molar ratio  $\sim 1E^{-4}$ . Std error bars are shown.

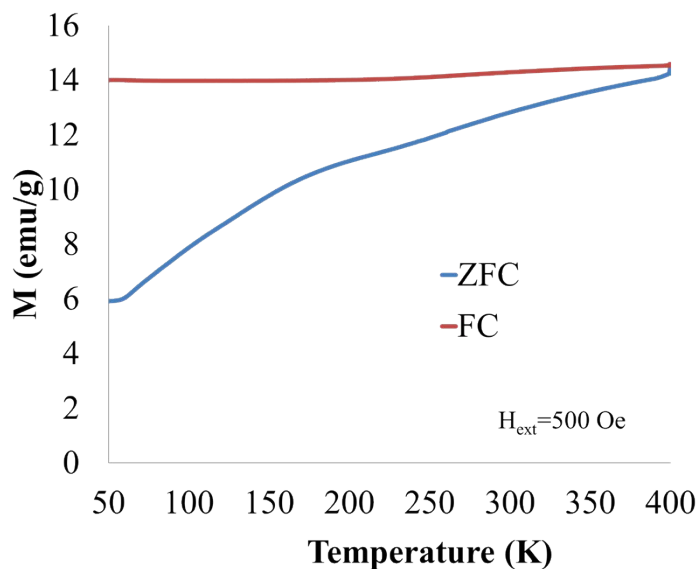

**Figure S11.** ZFC and FC curves acquired of a 100 % FeCo nanopowder with mean diameter  $\sim 71$  nm (run ID 39, Table S1).
